# Supplementary material for: The small molecule NSM00191 specifically represses the TNF-α/NF-кB axis in foot and ankle rheumatoid arthritis
Source: PubMed Central journal article supplement — Int J Biol Sci. 2018 Oct 3;14(12):1732–44. doi: 10.7150/ijbs.24232 (PMC6216029; doi:10.7150/ijbs.24232), 2018-10-03
Supplement: ijbsv14p1732s1.pdf [file ijbsv14p1732s1.pdf]

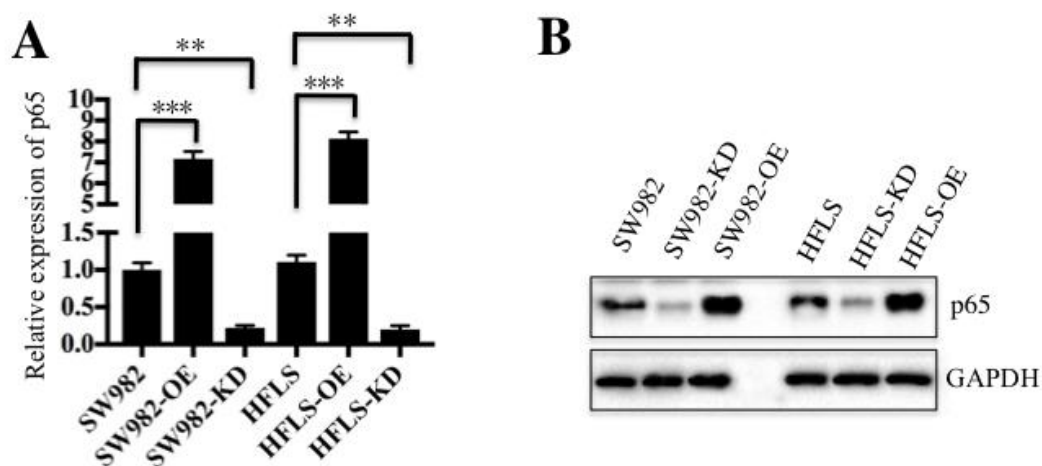

**Supplementary Figure 1. The mRNA and protein levels of p65 in overexpressing and knockdown cells.**

(A) The RNA from SW982 cells, SW982 cells overexpressing p65 (S-OE), SW982 cells with the knockdown p65 (S-KD), HFLS-RA (HFLS) cells, HFLS-RA cells overexpressing p65 (H-OE), and HFLS-RA cells with the knockdown p65 (H-KD) were subjected to qRT-PCR analysis. \*\*  $P < 0.001$ ; \*\*\*  $P < 0.0001$ . (B) The total proteins from SW982, S-OE, S-KD, HFLS, H-OE and H-KD cells were subjected to Western blot analysis to examine their p65 level. GAPDH was used as a loading control.

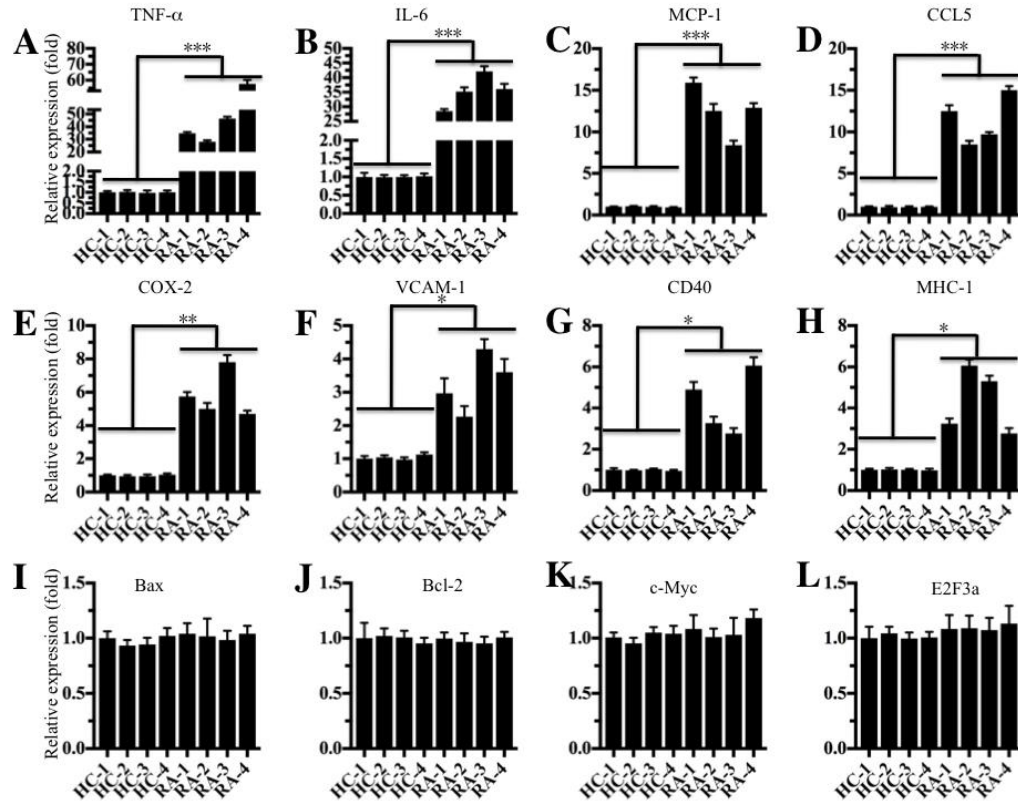

**Supplementary Figure 2. The inflammatory targets of NF-κB were activated in RA patients.**

RNA samples from four paired joint tissue specimens that were used in Figure 2A were subjected to qRT-PCR analysis to examine the expression of a number of genes, including TNF-α (A), IL-6 (B), MCP-1 (C), CCL5 (D), COX-2 (E), VCAM-1 (F), CD40 (G), MHC-1 (H), Bax (I), Bcl-2 (J), c-Myc (K), and E2F3a (L). \*  $P < 0.05$ ; \*\*  $P < 0.001$ ; \*\*\*  $P < 0.0001$ .

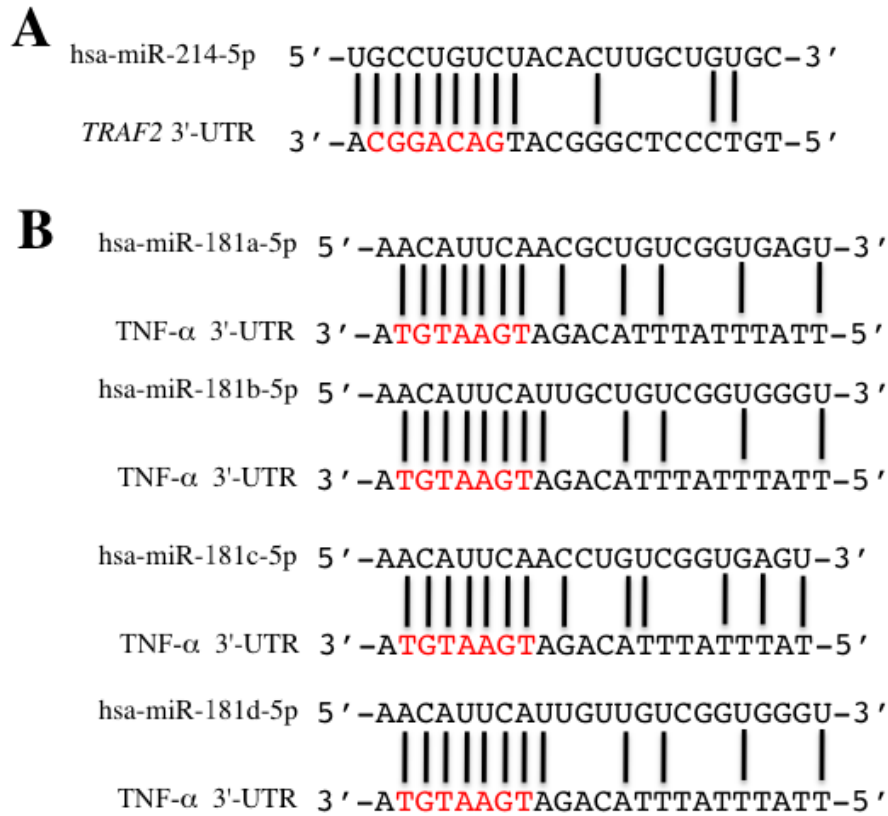

**Supplementary Figure 3. Schematic diagrams of several miRNAs that might target the members of the *TNF-α*/NF-κB pathway.**

(A) The 3'-UTR of *TRAF2* contains a putative miR-214-5p binding site. (B) The 3'-UTR of *TNF-α* contains a putative binding site for miR-181a-5p, miR-181b-5p, miR-181c-5p and miR-181d-5p.

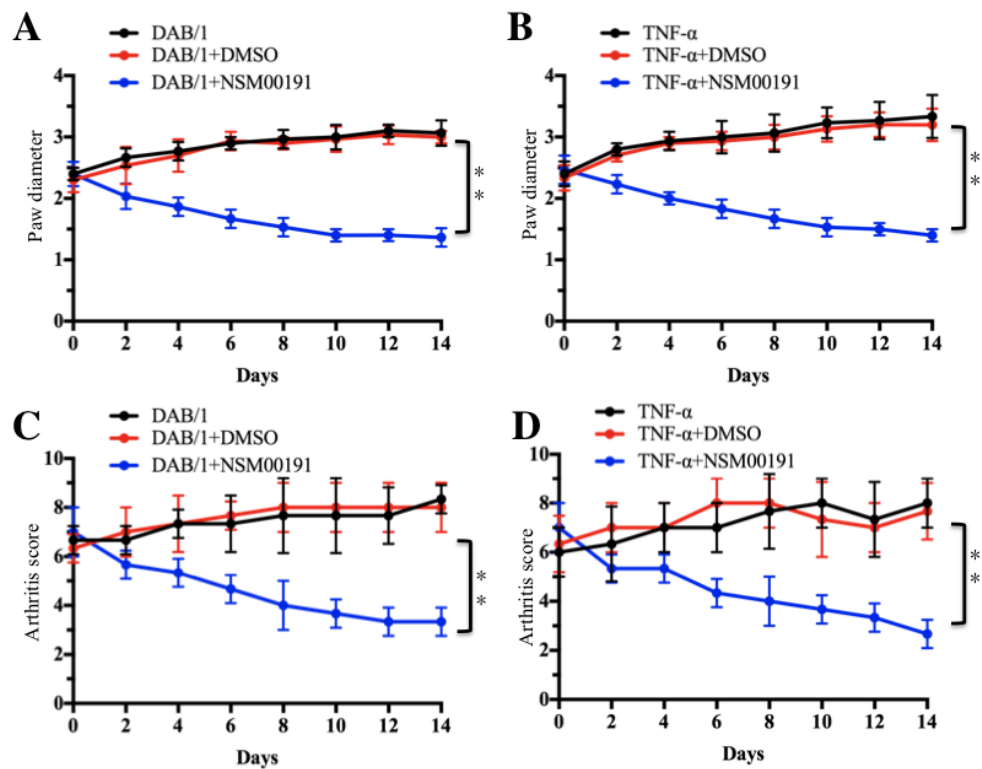

**Supplementary Figure 4. NSM00191 treatment decreased the severity of arthritis.**

The six-week old DBA/1 and TNF- $\alpha$  mice were injected with or without NSM00191, or DMSO, and then the paw diameter and clinical arthritis scores were measured for 14 days (n=15 mice in each group). **(A)** The paw diameter in DBA/1 mice. **(B)** The paw diameter in TNF- $\alpha$  mice. **(C)** The arthritis scores in DBA/1 mice. **(D)** The arthritis scores in TNF- $\alpha$  mice.  $**P < 0.001$ .

**Supplementary Table-1. Clinical features of the RA patients**

| <b>Patient</b> | <b>Age</b> | <b>Sex</b> | <b>Disease duration</b> | <b>Source of synovium</b> |
|----------------|------------|------------|-------------------------|---------------------------|
| <b>1</b>       | 48         | Female     | 2                       | Foot                      |
| <b>2</b>       | 55         | Female     | 5                       | Ankle                     |
| <b>3</b>       | 56         | Female     | 6                       | Ankle                     |
| <b>4</b>       | 58         | Female     | 8                       | Ankle                     |
| <b>5</b>       | 59         | Female     | 12                      | Ankle                     |
| <b>6</b>       | 61         | Female     | 10                      | Foot                      |
| <b>7</b>       | 63         | Female     | 7                       | Foot                      |
| <b>8</b>       | 65         | Female     | 15                      | Ankle                     |
| <b>9</b>       | 65         | Female     | 6                       | Foot                      |
| <b>10</b>      | 66         | Female     | 8                       | Ankle                     |
| <b>11</b>      | 66         | Female     | 10                      | Ankle                     |
| <b>12</b>      | 67         | Female     | 8                       | Foot                      |
| <b>13</b>      | 68         | Female     | 7                       | Foot                      |
| <b>14</b>      | 69         | Female     | 11                      | Ankle                     |
| <b>15</b>      | 69         | Female     | 6                       | Foot                      |
| <b>16</b>      | 70         | Female     | 12                      | Foot                      |
| <b>17</b>      | 70         | Female     | 5                       | Ankle                     |
| <b>18</b>      | 72         | Female     | 17                      | Ankle                     |
| <b>19</b>      | 72         | Female     | 11                      | Ankle                     |
| <b>20</b>      | 72         | Female     | 10                      | Foot                      |
| <b>21</b>      | 73         | Female     | 6                       | Foot                      |
| <b>22</b>      | 74         | Female     | 8                       | Foot                      |
| <b>23</b>      | 74         | Female     | 13                      | Foot                      |
| <b>24</b>      | 75         | Female     | 15                      | Ankle                     |
| <b>25</b>      | 44         | Male       | 4                       | Ankle                     |
| <b>26</b>      | 46         | Male       | 5                       | Ankle                     |
| <b>27</b>      | 49         | Male       | 8                       | Foot                      |
| <b>28</b>      | 55         | Male       | 10                      | Ankle                     |
| <b>29</b>      | 57         | Male       | 4                       | Foot                      |
| <b>30</b>      | 57         | Male       | 6                       | Ankle                     |
| <b>31</b>      | 60         | Male       | 8                       | Foot                      |
| <b>32</b>      | 61         | Male       | 12                      | Foot                      |
| <b>33</b>      | 62         | Male       | 3                       | Ankle                     |
| <b>34</b>      | 62         | Male       | 15                      | Ankle                     |
| <b>35</b>      | 65         | Male       | 3                       | Foot                      |
| <b>36</b>      | 65         | Male       | 7                       | Foot                      |
| <b>37</b>      | 68         | Male       | 6                       | Ankle                     |
| <b>38</b>      | 69         | Male       | 5                       | Ankle                     |
| <b>39</b>      | 70         | Male       | 8                       | Foot                      |
| <b>40</b>      | 70         | Male       | 9                       | Ankle                     |
| <b>41</b>      | 72         | Male       | 10                      | Foot                      |
| <b>42</b>      | 72         | Male       | 6                       | Foot                      |
| <b>43</b>      | 72         | Male       | 5                       | Ankle                     |
| <b>44</b>      | 74         | Male       | 15                      | Foot                      |
| <b>45</b>      | 74         | Male       | 20                      | Ankle                     |
| <b>46</b>      | 75         | Male       | 13                      | Ankle                     |

|           |           |             |           |             |
|-----------|-----------|-------------|-----------|-------------|
| <b>47</b> | <b>75</b> | <b>Male</b> | <b>11</b> | <b>Foot</b> |
| <b>48</b> | <b>76</b> | <b>Male</b> | <b>8</b>  | <b>Foot</b> |

**Supplementary Table-2 Primers used for qRT-PCR analyzes**

| <b>Gene</b>   | <b>Forward Primers</b>       | <b>Reverse primers</b>                   |
|---------------|------------------------------|------------------------------------------|
| TNF- $\alpha$ | 5'-AGACTTCCTTGAGACACGGAG-3'  | 5'-<br>CCTATTGTTTCAGCTCCGTTTTTCAC-<br>3' |
| IL-6          | 5'-AGTATGAGCGTTAGGACACTA-3'  | 5'-<br>CTGCATAGCCACTTTCCATTATT-<br>3'    |
| MCP-1         | 5'-GATACAGAGACTTGGGGAAAT-3'  | 5'-<br>TAGTTACAAAATATTCATTTCC-3'         |
| CCL5          | 5'-GCCTAGAAGAGCTTCTGAGGC-3'  | 5'-<br>TAAGCTCCTGTGAGGGGTTGAG-<br>3'     |
| COX-2         | 5'-GATAGGCCTATGTGCTAGCCC-3'  | 5'-AATACTATTATCTGTAATCAG-<br>3'          |
| VACM-1        | 5'-TGCCCATCTATGTCCCTTGCTG-3' | 5'-<br>TTTAAGCAATCTTGCTATGGCA-3'         |
| CD40          | 5'-CATCAGCAGGAGACTGGCTAA-3'  | 5'-<br>ATCCATAGGCAATATACATACA-<br>3'     |
| MHC-1         | 5'-CCCACGCTGACCTGTGCTCCCT-3' | 5'-ATGGCAAGAATTTGAGAAAGT-<br>3'          |
| Bax           | 5'-TCATCAGATGTGGTCTATAATG-3' | 5'-TCAGAGGGTCATCAATGAAC-3'               |
| Bcl-2         | 5'-TACCAAGCTGAGCACAGAAGA-3'  | 5'-CTCTTGCAAATTCTACCTTG-3'               |
| c-Myc         | 5'-AGACAGATCAGCAACAACCGA-3'  | 5'-CTCCTCTGCTTGGACGGACAG-<br>3'          |
| E2F3a         | 5'-AGTGTGTTTATATGTACAGAGT-3' | 5'-<br>AACAAGAGCCACAACAAAGAA-3'          |
